# Supplementary material for: The effect of a traditional Chinese quadri-combination therapy and its component quercetin on recurrent spontaneous abortion: A clinical trial, network pharmacology and experiments-based study
Source: Front Pharmacol. 2022 Oct 19;13:965694. doi: 10.3389/fphar.2022.965694 (PMC9626984; doi:10.3389/fphar.2022.965694)
Supplement: Supplementary file 2 [file DataSheet2.xlsx]

## Sheet: Supplementary Table 1
Supplementary Table S1 | Active components of each herb in BYLY
Herb name (Pinyin name/Latin name)	Molecular ID	Molecula name or Chemical structure	Oral bioavailability (OB)%	Drug-like (DL)
Baishao/Paeonia lactiflora Pall	MOL001910	11alpha,12alpha-epoxy-3beta-23-dihydroxy-30-norolean-20-en-28,12beta-olide	64.77	0.38
	MOL001918	paeoniflorgenone	87.59	0.37
	MOL001919	(3S,5R,8R,9R,10S,14S)-3,17-dihydroxy-4,4,8,10,14-pentamethyl-2,3,5,6,7,9-hexahydro-1H-cyclopenta[a]phenanthrene-15,16-dione	43.56	0.53
	MOL001921	Lactiflorin	49.12	0.8
	MOL001924	paeoniflorin	53.87	0.79
	MOL001925	paeoniflorin_qt	68.18	0.4
	MOL001928	albiflorin_qt	66.64	0.33
	MOL001930	benzoyl paeoniflorin	31.27	0.75
	MOL000211	Mairin	55.38	0.78
	MOL000358	beta-sitosterol	36.91	0.75
	MOL000359	sitosterol	36.91	0.75
	MOL000422	kaempferol	41.88	0.24
	MOL000492	(+)-catechin	54.83	0.24
Baizhu/Atractylodes macrocephala Koidz	MOL000020	12-senecioyl-2E,8E,10E-atractylentriol	62.4	0.22
	MOL000021	14-acetyl-12-senecioyl-2E,8E,10E-atractylentriol	60.31	0.31
	MOL000022	14-acetyl-12-senecioyl-2E,8Z,10E-atractylentriol	63.37	0.3
	MOL000028	α-Amyrin	39.51	0.76
	MOL000033	(3S,8S,9S,10R,13R,14S,17R)-10,13-dimethyl-17-[(2R,5S)-5-propan-2-yloctan-2-yl]-2,3,4,7,8,9,11,12,14,15,16,17-dodecahydro-1H-cyclopenta[a]phenanthren-3-ol	36.23	0.78
	MOL000049	3β-acetoxyatractylone	54.07	0.22
	MOL000072	8β-ethoxy atractylenolide Ⅲ	35.95	0.21
Chuanxiong/Ligusticum striatum	MOL001494	Mandenol	42	0.19
	MOL002135	Myricanone	40.6	0.51
	MOL002140	Perlolyrine	65.95	0.27
	MOL002151	senkyunone	47.66	0.24
	MOL002157	wallichilide	42.31	0.71
	MOL000359	sitosterol	36.91	0.75
	MOL000433	FA	68.96	0.71
Danggui/Angelica sinensis	MOL000358	beta-sitosterol	36.91	0.75
	MOL000449	Stigmasterol	43.83	0.76
Dangshen/Codonopsis pilosulae	MOL001006	poriferasta-7,22E-dien-3beta-ol	42.98	0.76
	MOL002140	Perlolyrine	65.95	0.27
	MOL002879	Diop	43.59	0.39
	MOL003036	ZINC03978781	43.83	0.76
	MOL000449	Stigmasterol	43.83	0.76
	MOL003896	7-Methoxy-2-methyl isoflavone	42.56	0.2
	MOL004355	Spinasterol	42.98	0.76
	MOL004492	Chrysanthemaxanthin	38.72	0.58
	MOL005321	Frutinone A	65.9	0.34
	MOL000006	luteolin	36.16	0.25
	MOL006554	Taraxerol	38.4	0.77
	MOL006774	stigmast-7-enol	37.42	0.75
	MOL007059	3-beta-Hydroxymethyllenetanshiquinone	32.16	0.41
	MOL007514	methyl icosa-11,14-dienoate	39.67	0.23
	MOL008391	5alpha-Stigmastan-3,6-dione	33.12	0.79
	MOL008393	7-(beta-Xylosyl)cephalomannine_qt	38.33	0.29
	MOL008397	Daturilin	50.37	0.77
	MOL008400	glycitein	50.48	0.24
	MOL008406	Spinoside A	39.97	0.4
	MOL008407	(8S,9S,10R,13R,14S,17R)-17-[(E,2R,5S)-5-ethyl-6-methylhept-3-en-2-yl]-10,13-dimethyl-1,2,4,7,8,9,11,12,14,15,16,17-dodecahydrocyclopenta[a]phenanthren-3-one	45.4	0.76
	MOL008411	11-Hydroxyrankinidine	40	0.66
Duzhong/Eucommia ulmoides	MOL009030	Dehydrodieugenol	30.1	0.24
	MOL009007	Eucommin A	30.51	0.85
	MOL007059	3-beta-Hydroxymethyllenetanshiquinone	32.16	0.41
	MOL009047	(+)-Eudesmin	33.29	0.62
	MOL011604	Syringetin	36.82	0.37
	MOL000358	beta-sitosterol	36.91	0.75
	MOL002773	beta-carotene	37.18	0.58
	MOL000422	kaempferol	41.88	0.24
	MOL005922	Acanthoside B	43.35	0.77
	MOL009038	GBGB	45.58	0.83
	MOL000098	quercetin	46.43	0.28
	MOL000073	ent-Epicatechin	48.96	0.24
	MOL000443	Erythraline	49.18	0.55
	MOL009055	hirsutin_qt	49.81	0.37
	MOL009053	4-[(2S,3R)-5-[(E)-3-hydroxyprop-1-enyl]-7-methoxy-3-methylol-2,3-dihydrobenzofuran-2-yl]-2-methoxy-phenol	50.76	0.39
	MOL009029	Dehydrodiconiferyl alcohol 4,gamma'-di-O-beta-D-glucopyanoside_qt	51.44	0.4
	MOL009057	liriodendrin_qt	53.14	0.8
	MOL000211	Mairin	55.38	0.78
	MOL009027	Cyclopamine	55.42	0.82
	MOL008240	(E)-3-[4-[(1R,2R)-2-hydroxy-2-(4-hydroxy-3-methoxy-phenyl)-1-methylol-ethoxy]-3-methoxy-phenyl]acrolein	56.32	0.36
	MOL002058	40957-99-1	57.2	0.62
	MOL007563	Yangambin	57.53	0.81
	MOL009015	(-)-Tabernemontanine	58.67	0.61
	MOL004367	olivil	62.23	0.41
	MOL009031	Cinchonan-9-al, 6'-methoxy-, (9R)-	68.22	0.4
	MOL009042	Helenalin	77.01	0.19
	MOL009009	(+)-medioresinol	87.19	0.62
	MOL006709	AIDS214634	92.43	0.55
Huangqi/Astragalus mongholicu	MOL000211	Mairin	55.38	0.78
	MOL000239	Jaranol	50.83	0.29
	MOL000296	hederagenin	36.91	0.75
	MOL000033	(3S,8S,9S,10R,13R,14S,17R)-10,13-dimethyl-17-[(2R,5S)-5-propan-2-yloctan-2-yl]-2,3,4,7,8,9,11,12,14,15,16,17-dodecahydro-1H-cyclopenta[a]phenanthren-3-ol	36.23	0.78
	MOL000354	isorhamnetin	49.6	0.31
	MOL000371	3,9-di-O-methylnissolin	53.74	0.48
	MOL000374	5'-hydroxyiso-muronulatol-2',5'-di-O-glucoside	41.72	0.69
	MOL000378	7-O-methylisomucronulatol	74.69	0.3
	MOL000379	9,10-dimethoxypterocarpan-3-O-β-D-glucoside	36.74	0.92
	MOL000380	(6aR,11aR)-9,10-dimethoxy-6a,11a-dihydro-6H-benzofurano[3,2-c]chromen-3-ol	64.26	0.42
	MOL000387	Bifendate	31.1	0.67
	MOL000392	formononetin	69.67	0.21
	MOL000398	isoflavanone	109.99	0.3
	MOL000417	Calycosin	47.75	0.24
	MOL000422	kaempferol	41.88	0.24
	MOL000433	FA	68.96	0.71
	MOL000438	(3R)-3-(2-hydroxy-3,4-dimethoxyphenyl)chroman-7-ol	67.67	0.26
	MOL000439	isomucronulatol-7,2'-di-O-glucosiole	49.28	0.62
	MOL000442	1,7-Dihydroxy-3,9-dimethoxy pterocarpene	39.05	0.48
	MOL000098	quercetin	46.43	0.28
Huangqin/Scutellaria baicalensis	MOL001689	acacetin	34.97	0.24
	MOL000173	wogonin	30.68	0.23
	MOL000228	(2R)-7-hydroxy-5-methoxy-2-phenylchroman-4-one	55.23	0.2
	MOL002714	baicalein	33.52	0.21
	MOL002908	5,8,2'-Trihydroxy-7-methoxyflavone	37.01	0.27
	MOL002909	5,7,2,5-tetrahydroxy-8,6-dimethoxyflavone	33.82	0.45
	MOL002910	Carthamidin	41.15	0.24
	MOL002911	2,6,2',4'-tetrahydroxy-6'-methoxychaleone	69.04	0.22
	MOL002913	Dihydrobaicalin_qt	40.04	0.21
	MOL002914	Eriodyctiol (flavanone)	41.35	0.24
	MOL002915	Salvigenin	49.07	0.33
	MOL002917	5,2',6'-Trihydroxy-7,8-dimethoxyflavone	45.05	0.33
	MOL002925	5,7,2',6'-Tetrahydroxyflavone	37.01	0.24
	MOL002926	dihydrooroxylin A	38.72	0.23
	MOL002927	Skullcapflavone II	69.51	0.44
	MOL002928	oroxylin a	41.37	0.23
	MOL002932	Panicolin	76.26	0.29
	MOL002933	5,7,4'-Trihydroxy-8-methoxyflavone	36.56	0.27
	MOL002934	NEOBAICALEIN	104.34	0.44
	MOL002937	DIHYDROOROXYLIN	66.06	0.23
	MOL000358	beta-sitosterol	36.91	0.75
	MOL000359	sitosterol	36.91	0.75
	MOL000525	Norwogonin	39.4	0.21
	MOL000552	5,2'-Dihydroxy-6,7,8-trimethoxyflavone	31.71	0.35
	MOL000073	ent-Epicatechin	48.96	0.24
	MOL000449	Stigmasterol	43.83	0.76
	MOL001458	coptisine	30.67	0.86
	MOL001490	bis[(2S)-2-ethylhexyl] benzene-1,2-dicarboxylate	43.59	0.35
	MOL001506	Supraene	33.55	0.42
	MOL002879	Diop	43.59	0.39
	MOL002897	epiberberine	43.09	0.78
	MOL008206	Moslosooflavone	44.09	0.25
	MOL010415	11,13-Eicosadienoic acid, methyl ester	39.28	0.23
	MOL012245	5,7,4'-trihydroxy-6-methoxyflavanone	36.63	0.27
	MOL012246	5,7,4'-trihydroxy-8-methoxyflavanone	74.24	0.26
	MOL012266	rivularin	37.94	0.37
Nanguadi/Cucurbita moschata	MOL000358	beta-sitosterol	36.91	0.75
Sangjisheng/Taxillus chinensis	MOL000359	sitosterol	36.91	0.75
	MOL000098	quercetin	46.43	0.28
Shengdihuang/Rehmannia glutinosa	MOL000358	beta-sitosterol	36.91	0.75
	MOL000493	campesterol	37.58	0.71
	MOL002649	coniferin	10.28	0.27
Tusizi/Cuscuta chinensis	MOL001558	sesamin	56.55	0.83
	MOL000184	NSC63551	39.25	0.76
	MOL000354	isorhamnetin	49.6	0.31
	MOL000358	beta-sitosterol	36.91	0.75
	MOL000422	kaempferol	41.88	0.24
	MOL005043	campest-5-en-3beta-ol	37.58	0.71
	MOL005440	Isofucosterol	43.78	0.76
	MOL005944	matrine	63.77	0.25
	MOL006649	sophranol	55.42	0.28
	MOL000953	CLR	37.87	0.68
	MOL000098	quercetin	46.43	0.28
Xuduan/Dipsacus asper	MOL003152	Gentisin	64.06	0.21
	MOL000358	beta-sitosterol	36.91	0.75
	MOL000359	sitosterol	36.91	0.75
	MOL009312	(E,E)-3,5-Di-O-caffeoylquinic acid	48.14	0.68
	MOL009317	Cauloside A_qt	43.32	0.81
	MOL008188	Japonine	44.11	0.25
	MOL009322	Sylvestroside III	48.02	0.53
	MOL009323	Sylvestroside III_qt	56.47	0.43
Zhumagen/Boehmeria nivea	MOL000211	Mairin	55.38	0.78
	MOL000296	hederagenin	36.91	0.75
	MOL000358	beta-sitosterol	36.91	0.75
	MOL000492	(+)-catechin	54.83	0.24
	MOL000098	quercetin	46.43	0.28
Zisugeng/Perilla frutescens var. crispa	MOL001645	Linoleyl acetate	42.1	0.2

## Sheet: Supplementary Table 2
Supplementary Table S2 | Active compounds derived from more than one herb in BYLY
Molecular ID	Molecular name	Sources
MOL000358	beta-sitosterol	Shengdihuang, Baishao, Huangqin, Duzhong, Xuduan, Tuzisi, Danggui, Zhumagen, Nanguadi
MOL000359	sitosterol	Sangjisheng, Xuduan, Chuanxiong, Baishao, Huangqin
MOL000098	quercetin	Sangjisheng, Zhumagen, Duzhong, Tusizi, Huangqi
MOL000211	mairin	Baishao, Huangqi, Duzhong, Zhumagen
MOL000422	kaempferol	Tusizi, Duzhong, Baishao, Huangqi
MOL000449	Stigmasterol	Dangsheng, Huangqin, Danggui
MOL002140	Perlolyrine	Dangsheng, Chuanxiong
MOL002879	Diop	Dangsheng, Huangqin
MOL007059	3-beta-Hydroxymethyllenetanshiquinone	Dangshen, Duzhong
MOL000033	(3S,8S,9S,10R,13R,14S,17R)-10,13-dimethyl-17-[(2R,5S)-5-propan-2-yloctan-2-yl]-2,3,4,7,8,9,11,12,14,15,16,17-dodecahydro-1H-cyclopenta[a]phenanthren-3-ol	Huangqi, Baizhu
MOL000492	(+)-catechin	Baishao, Zhumagen
MOL000073	ent-Epicatechin	Huangqin, Duzhong
MOL000354	isorhamnetin	Tusizi, Huangqi
MOL000296	hederagenin	Huangqi, Zhumagen
MOL000433	FA	Huangqi, Chuanxiong

## Sheet: Supplementary Table 3
Supplementary Table S3 | Core regulatory targets
Gene Name	Protein Name
ABCG2	Broad substrate specificity ATP-binding cassette transporter ABCG2
ACADM	Medium-chain specific acyl-CoA dehydrogenase, mitochondrial
ACHE	Acetylcholinesterase
ACP3	Prostatic acid phosphatase
ADRA2B	Alpha-2B adrenergic receptor
ADRB1	Beta-1 adrenergic receptor
ADRB2	Beta-2 adrenergic receptor
AHR	Aryl hydrocarbon receptor
AKT1	RAC-alpha serine/threonine-protein kinase
ALB	Albumin
ALOX5	Polyunsaturated fatty acid 5-lipoxygenase
AR	Androgen receptor
BAX	Apoptosis regulator BAX
BCL2	Apoptosis regulator Bcl-2
BCL2L1	Bcl-2-like protein 1
BIRC5	Baculoviral IAP repeat-containing protein 5
CASP3	Caspase-3
CASP7	Caspase-7
CASP8	Caspase-8
CASP9	Caspase-9
CAV1	Caveolin-1
CCL2	C-C motif chemokine 2
CCNA2	Cyclin-A2
CCNB1	G2/mitotic-specific cyclin-B1
CCND1	G1/S-specific cyclin-D1
CD14	Monocyte differentiation antigen CD14
CD40LG	CD40 ligand
CD44	CD44 antigen
CDK1	Cyclin-dependent kinase 1
CDK2	Cyclin-dependent kinase 2
CDK4	Cyclin-dependent kinase 4
CDKN1A	Cyclin-dependent kinase inhibitor 1
CHEK1	Serine/threonine-protein kinase Chk1
CHEK2	Serine/threonine-protein kinase Chk2
CRP	C-reactive protein
CTNNB1	Catenin beta-1
CXCL10	C-X-C motif chemokine 10
CXCL8	Interleukin-8
CYCS	Cytochrome c
CYP19A1	Aromatase
CYP1A1	Cytochrome P450 1A1
CYP1B1	Cytochrome P450 1B1
CYP2C9	Cytochrome P450 2C9
CYP3A4	Cytochrome P450 3A4
DPP4	Dipeptidyl peptidase 4
DRD2	D(2) dopamine receptor
EGFR	Epidermal growth factor receptor
ELK1	ETS domain-containing protein Elk-1
ERBB2	Receptor tyrosine-protein kinase erbB-2
ERBB3	Receptor tyrosine-protein kinase erbB-3
ESR1	Estrogen receptor
ESR2	Estrogen receptor beta
F10	Coagulation factor X
F2	Prothrombin
F3	Tissue factor
F7	Coagulation factor VII
FASLG	Tumor necrosis factor ligand superfamily member 6
FN1	Fibronectin
FOS	Proto-oncogene c-Fos
GJA1	Gap junction alpha-1 protein
GRIA2	Glutamate receptor 2
GSTM1	Glutathione S-transferase Mu 1
HAS2	Hyaluronan synthase 2
HIF1A	Hypoxia-inducible factor 1-alpha
HMOX1	Heme oxygenase 1
HPSE	Heparanase
HSD3B1	3 beta-hydroxysteroid dehydrogenase/Delta 5-->4-isomerase type 1
HSD3B2	3 beta-hydroxysteroid dehydrogenase/Delta 5-->4-isomerase type 2
HSP90AA1	Heat shock protein HSP 90-alpha
HSPB1	Heat shock protein beta-1
HTR1D	5-hydroxytryptamine receptor 1D
HTR2A	5-hydroxytryptamine receptor 2A
ICAM1	Intercellular adhesion molecule 1
IFNG	Interferon gamma
IGF2	Insulin-like growth factor II
IGFBP3	Insulin-like growth factor-binding protein 3
IL10	Interleukin-10
IL1A	Interleukin-1 alpha
IL1B	Interleukin-1 beta
IL2	Interleukin-2
IL4	Interleukin-4
IL6	Interleukin-6
INSR	Insulin receptor
IRF1	Interferon regulatory factor 1
JUN	Transcription factor AP-1
KCNH2	Potassium voltage-gated channel subfamily H member 2
KDR	Vascular endothelial growth factor receptor 2
MAOA	Amine oxidase A
MAOB	Amine oxidase B
MAP2	Microtubule-associated protein 2
MAPK1	Mitogen-activated protein kinase 1
MAPK14	Mitogen-activated protein kinase 14
MAPK8	Mitogen-activated protein kinase 8
MDM2	E3 ubiquitin-protein ligase Mdm2
MET	Hepatocyte growth factor receptor
MMP1	Interstitial collagenase
MMP2	72 kDa type IV collagenase
MMP3	Stromelysin-1
MMP8	Neutrophil collagenase
MMP9	Matrix metalloproteinase-9
MPO	Myeloperoxidase
MYC	Myc proto-oncogene protein
NCOA1	Nuclear receptor coactivator 1
NCOA2	Nuclear receptor coactivator 2
NFATC1	Nuclear factor of activated T-cells, cytoplasmic 1
NOS2	Nitric oxide synthase, inducible
NOS3	Nitric oxide synthase, endothelial
NR3C1	Glucocorticoid receptor
ODC1	Ornithine decarboxylase
OLR1	Oxidized low-density lipoprotein receptor 1
PARP1	Poly polymerase 1
PCNA	Proliferating cell nuclear antigen
PGR	Progesterone receptor
PIK3CG	Phosphatidylinositol 4,5-bisphosphate 3-kinase catalytic subunit gamma isoform
PIM1	Serine/threonine-protein kinase pim-1
PLAT	Tissue-type plasminogen activator
PLAU	Urokinase-type plasminogen activator
PON1	Serum paraoxonase/arylesterase 1
PPARG	Peroxisome proliferator-activated receptor gamma
PRKCA	Protein kinase C alpha type
PTGER3	Prostaglandin E2 receptor EP3 subtype
PTGS1	Prostaglandin G/H synthase 1
PTGS2	Prostaglandin G/H synthase 2
RAF1	RAF proto-oncogene serine/threonine-protein kinase
RB1	Retinoblastoma-associated protein
RUNX2	Runt-related transcription factor 2
RXRA	Retinoic acid receptor RXR-alpha
SCN5A	Sodium channel protein type 5 subunit alpha
SELE	E-selectin
SERPINE1	Plasminogen activator inhibitor 1
SIRT1	NAD-dependent protein deacetylase sirtuin-1
SLC6A2	Sodium-dependent noradrenaline transporter
SLC6A4	Sodium-dependent serotonin transporter
SLPI	Antileukoproteinase
SOD1	Superoxide dismutase [Cu-Zn]
SPP1	Osteopontin
STAT1	Signal transducer and activator of transcription 1-alpha/beta
TGFB1	Transforming growth factor beta-1 proprotein [Cleaved into: Latency-associated peptide
THBD	Thrombomodulin
TNF	Tumor necrosis factor
TOP1	DNA topoisomerase 1
TOP2A	DNA topoisomerase 2-alpha
TP53	Cellular tumor antigen p53
TYR	Tyrosinase
VCAM1	Vascular cell adhesion protein 1
XIAP	E3 ubiquitin-protein ligase XIAP

## Sheet: Supplementary Table 4
Supplementary Table S4 | Primer sequences
Gene	Primer	Sequence (5′-3′)
β-actin	Forward	TGGCACCCAGCACAATGAA
	Reverse	CTAAGTCATAGTCCGCCTAGAAGCA
Drp1	Forward	ACATCATCCAGCTGCCTCAAATC
	Reverse	GTCTCCGGGTGACAATTCCAGTA
Mfn1	Forward	TGGCTAAGAAGGCGATTACTGC
	Reverse	TGGCTAAGAAGGCGATTACTGC
Mfn2	Forward	AGCAGATTACGGAGGAAGTGGAGAG
	Reverse	GAGGACTACTGGAGAAGGGTGGAAG
Opa1	Forward	TGTGAGGTCTGCCAGTCTTTA
	Reverse	TGTCCTTAATTGGGGTCGTTG
miR-106a-5p	Forward	AAAAGTGCTTACAGTGCAGGTAG
miR-106b-5p	Forward	TAAAGTGCTGACAGTGCAGAT
miR-130b-3p	Forward	TAAAGTGCTGACAGTGCAGAT
miR-17-5p	Forward	TAAAGTGCTGACAGTGCAGAT
miR-205-5p	Forward	TTCATTCCACCGGAGTCTG
miR-20a-5p	Forward	TAAAGTGCTTATAGTGCAGGTAG
miR-20b-5p	Forward	CAAAGTGCTCATAGTGCAGGTAG
miR-21-5p	Forward	TAGCTTATCAGACTGATGTTGA
miR-34a-5p	Forward	TGGCAGTGTCTTAGCTGGTTGT
miR-34c-5p	Forward	CAGTGTAGTTAGCTGATTGC
miR-449a	Forward	CAGTGTATTGTTAGCTGGT
miR-449b-5p	Forward	CAGTGTATTGTTAGCTGGC
miR-519d-3p	Forward	AAGTGCCTCCCTTTAGAGTG
miR-590-5p	Forward	GAGCTTATTCATAAAAGTGCAG
miR-93-5p	Forward	CAAAGTGCTGTTCGTGCAGGTAG
